# Supplementary material for: Non-Oxidative Propane Dehydrogenation on CrOx-ZrO2-SiO2 Catalyst Prepared by One-Pot Template-Assisted Method
Source: MDPI journal article supplement (doi:10.3390/molecules27186095), 2022-09-18
Supplement: s1 [file s1]

## Supplementary materials for article

Non-oxidative propane dehydrogenation on  $\text{CrO}_x\text{-ZrO}_2\text{-SiO}_2$  catalyst prepared by one-pot template-assisted method

Elena V. Golubina, Igor Yu. Kaplin, Anastasia V. Gorodnova, Ekaterina S. Lokteva,  
Oksana Ya. Isaykina, Konstantin I. Maslakov

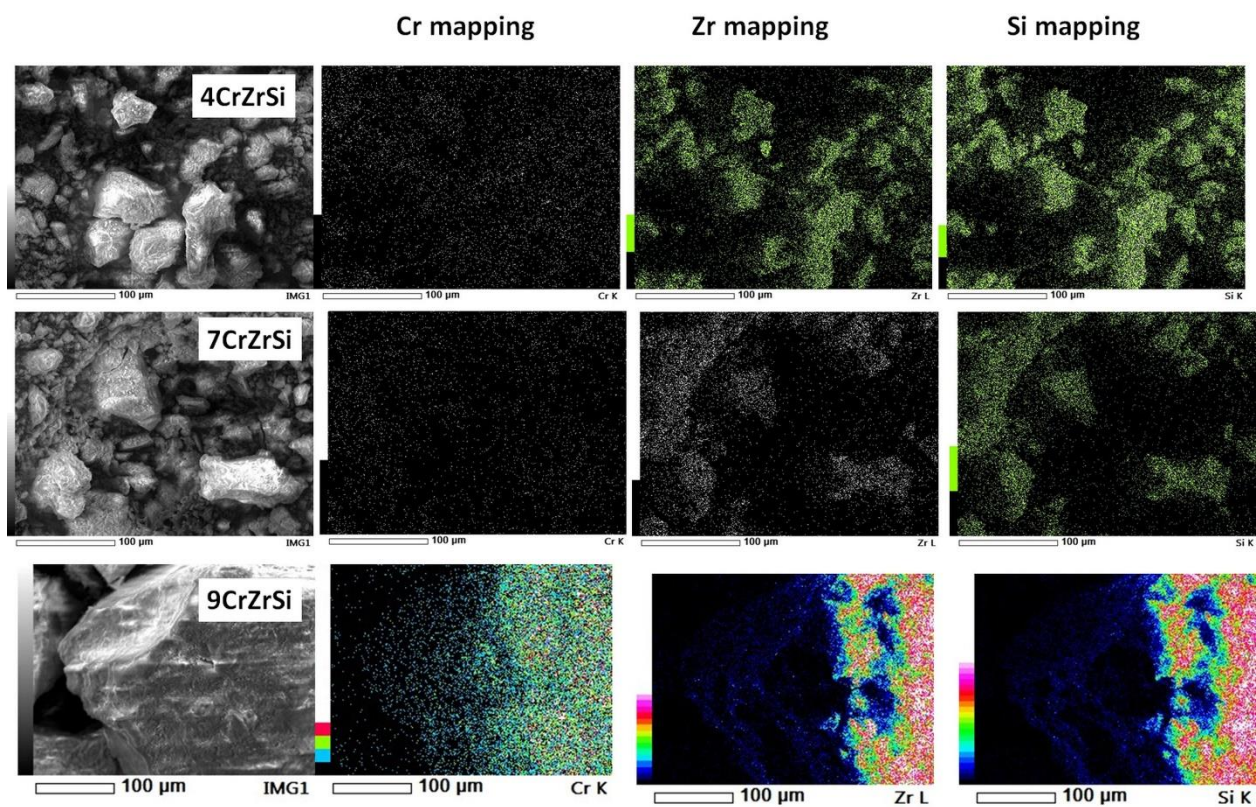

**Figure S1.** SEM images and SEM-EDX elemental mappings of fresh CrZrSi catalysts.

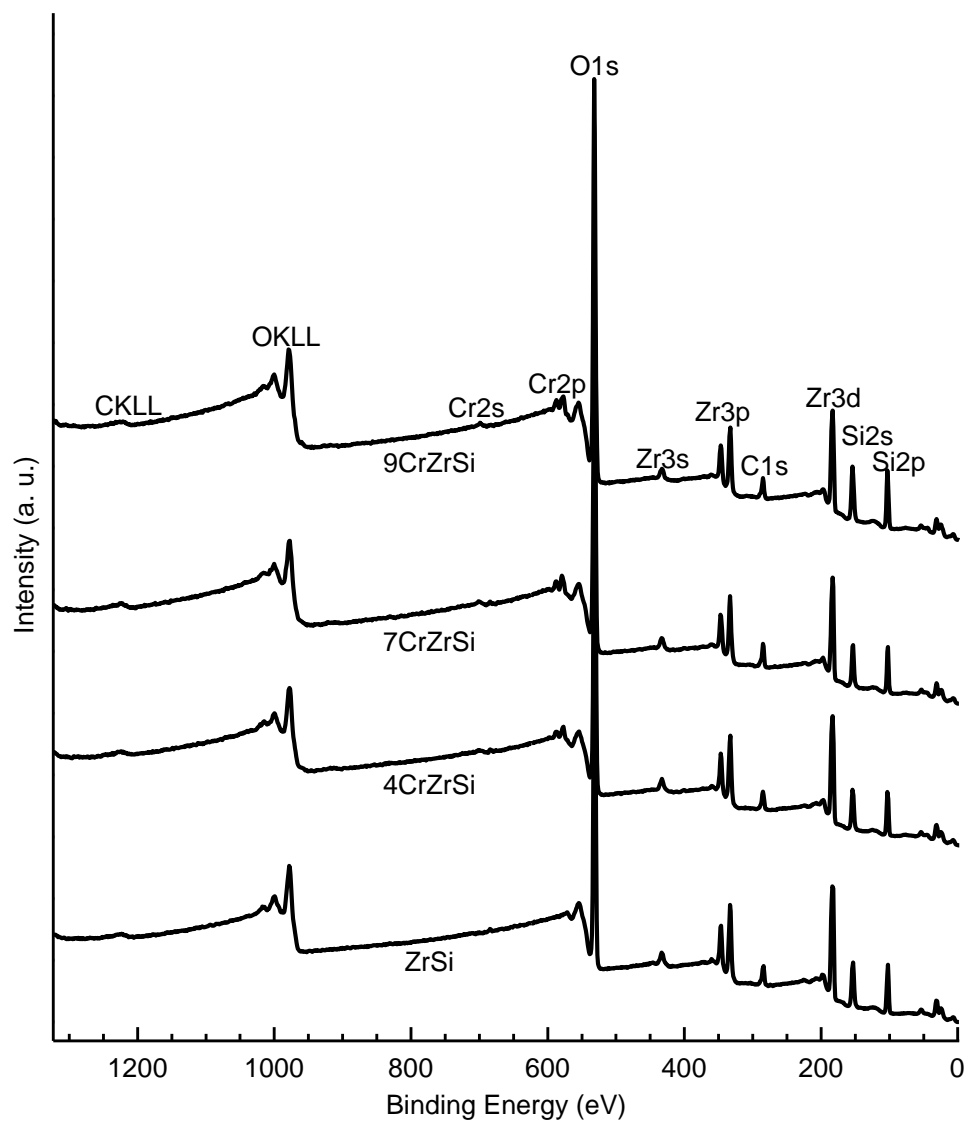

**Figure S2.** Survey XPS spectra of fresh ZrSi and CrZrSi catalysts

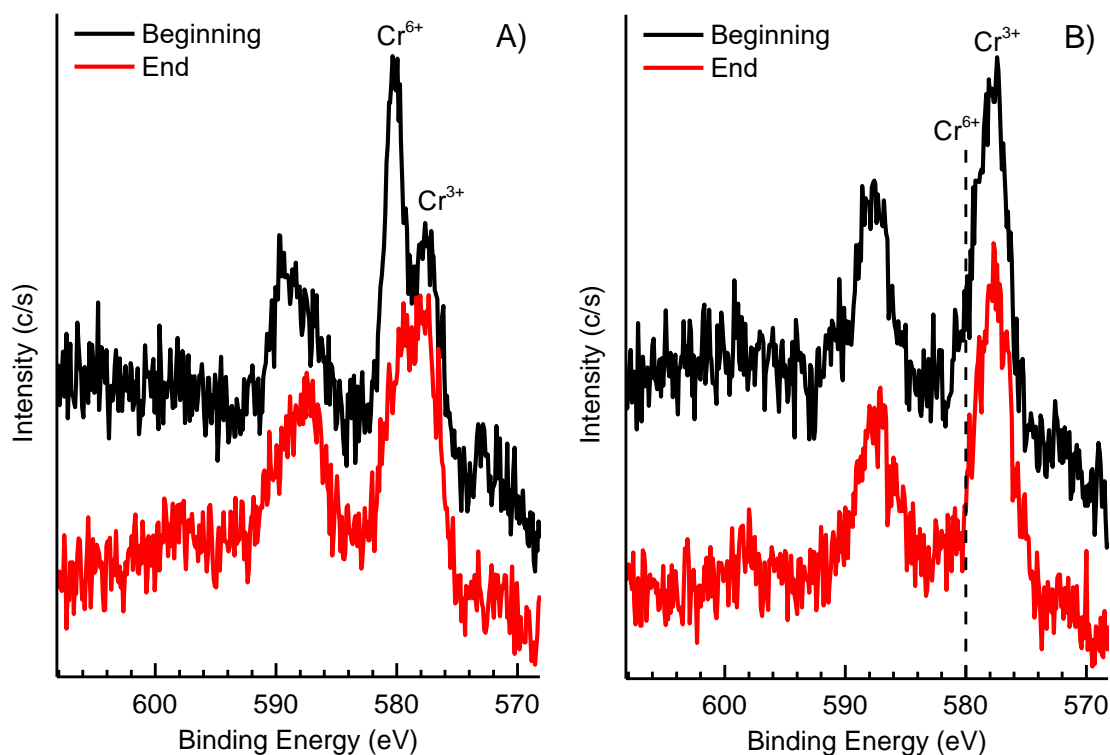

Figure S3. Cr2p XPS spectra of fresh (A) and hydrogen treated (B) 7CrZrSi catalyst. Spectra were recorded in less than 100 s at the beginning (immediately after X-ray gun and neutralizer were switched on) and at the end of XPS experiment.

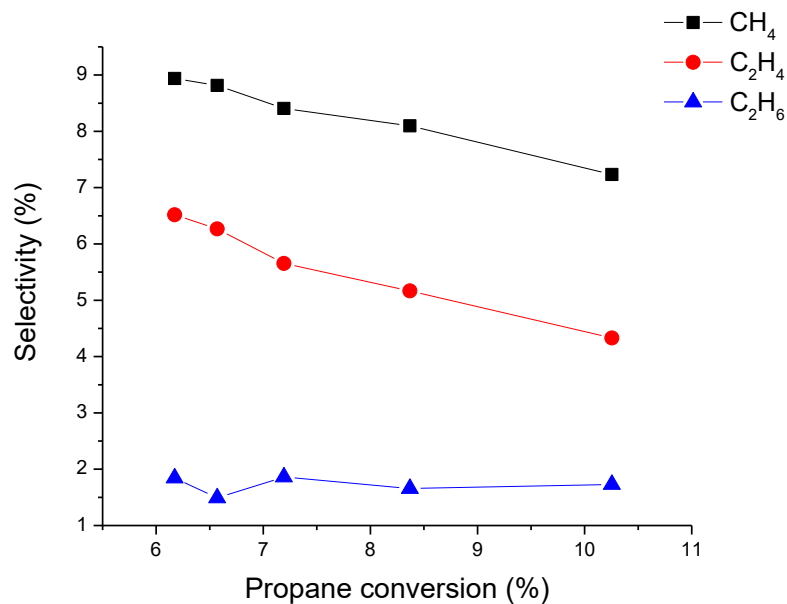

Figure S4. CH<sub>4</sub>, C<sub>2</sub>H<sub>4</sub> and C<sub>2</sub>H<sub>6</sub> selectivities vs propane conversion during PDH at 600°C on 9CrZrSi

**Table S1.** Binding energies of XPS peaks for the fresh and hydrogen treated ZrSi and CrZrSi catalysts and reference compounds. Both experimental and literature binding energies were corrected to C1s peak at 285.0 eV.

| Sample                         | Si2p  | Zr3d <sub>5/2</sub> | Cr2p <sub>3/2</sub> |                  | C1s   | Reference |
|--------------------------------|-------|---------------------|---------------------|------------------|-------|-----------|
|                                |       |                     | Cr <sup>3+</sup>    | Cr <sup>6+</sup> |       | This work |
| ZrSi                           | 103.2 | 183.1               |                     |                  | 285.0 | This work |
| 4CrZrSi                        | 103.1 | 183.0               | 577.5               | 580.1            | 285.0 | This work |
| 7CrZrSi                        | 102.9 | 182.9               | 577.3               | 580.0            | 285.0 | This work |
| 9CrZrSi                        | 103.3 | 182.9               | 577.3               | 580.2            | 285.0 | This work |
| 4CrZrSi_H2                     | 102.9 | 182.9               | 577.6               | 580.1            | 285.0 | This work |
| 7CrZrSi_H2                     | 103.2 | 183.0               | 577.7               | 579.9            | 285.0 | This work |
| 9CrZrSi_H2                     | 103.5 | 183.1               | 577.3               | 579.9            | 285.0 | This work |
| ZrO <sub>2</sub>               |       | 182.5               |                     |                  | 285.0 | [1]       |
| SiO <sub>2</sub>               | 103.0 |                     |                     |                  | 285.0 | [1]       |
| ZrSiO <sub>4</sub>             | 103.4 | 183.6               |                     |                  | 285.0 | [1]       |
| Cr <sub>2</sub> O <sub>3</sub> |       |                     | 576.7               |                  | 285.0 | [2]       |
| Cr(OH) <sub>3</sub>            |       |                     | 577.5               |                  | 285.0 | [3]       |
| CrO <sub>3</sub>               |       |                     |                     | 579.8            | 285.0 | [3]       |

#### References:

1. Dementjev A.P., Ivanova O.P., Vasilyev L.A., Naumkin A.V., Nemirovsky D.M., Shalaev D.Y. Altered layer as sensitive initial chemical state indicator\* // Journal of Vacuum Science & Technology A. 1994. V. 12. № 2. P. 423-427.
2. Biesinger M.C., Brown C., Mycroft J.R., Davidson R.D., McIntyre N.S. X-ray photoelectron spectroscopy studies of chromium compounds // Surface and Interface Analysis. 2004. V. 36. № 12. P. 1550-1563.
3. Biesinger M.C., Payne B.P., Grosvenor A.P., Lau L.W.M., Gerson A.R., Smart R.S.C. Resolving surface chemical states in XPS analysis of first row transition metals, oxides and hydroxides: Cr, Mn, Fe, Co and Ni // Applied Surface Science. 2011. V. 257. № 7. P. 2717-2730.
